# Supplementary material for: Polyethylenimine-modified graphitic carbon nitride nanosheets: a label-free Raman traceable siRNA delivery system
Source: Royal Society of Chemistry journal article supplement (doi:10.1039/d1tb00984b), 2021-01-01
Supplement: d1tb00984b1.pdf [file d1tb00984b1.pdf]

1 Supporting Information

2 **Polyethyleneimine-modified graphitic carbon nitride nanosheets: a label-free Raman**  
3 **traceable siRNA delivery system**

4

5 Lei Liu<sup>a,b,c</sup>, Xin Du<sup>d,\*</sup>

6 <sup>a</sup> Chemical Pharmaceutical Research Center, Tasly Academy, Tasly Holding Group Co., Ltd., Tianjin 300410, P.R. China.

7 <sup>b</sup> Jiangsu Tasly Diyi Pharmaceutical Co., Ltd., Huaian 223003, P.R. China.

8 <sup>c</sup> School of Chemical Engineering, The University of Adelaide, Adelaide, SA 5005, Australia.

9 <sup>d</sup> Beijing Key Laboratory for Bioengineering and Sensing Technology, Department of Chemistry & Biological Engineering, University of  
10 Science & Technology Beijing, Beijing 100083, P. R. China.

11

12

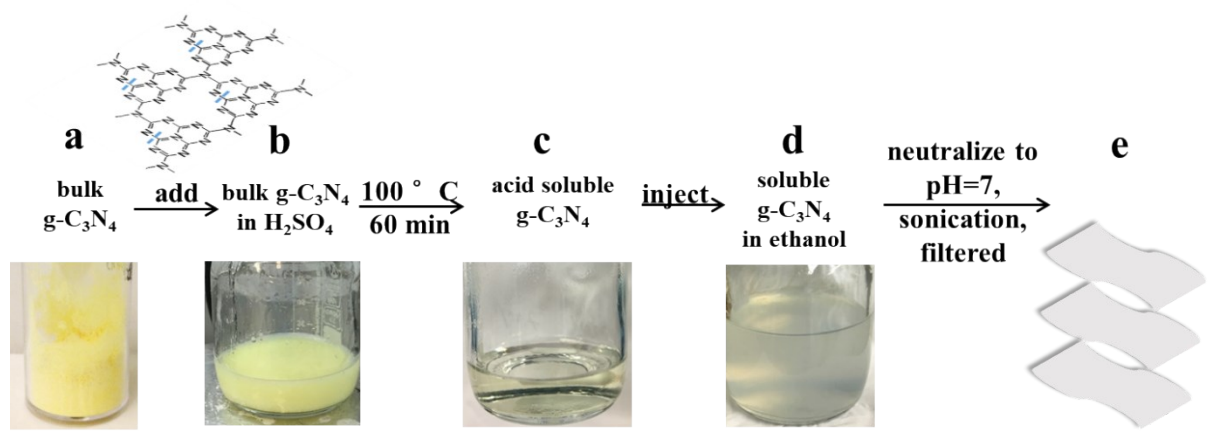

1

2 **Fig. S1** Synthesis process of acidified layered  $g\text{-C}_3\text{N}_4$  nanosheets and photographs of (a) bulk  
 3  $g\text{-C}_3\text{N}_4$  powder, (b)  $g\text{-C}_3\text{N}_4$  powder in  $\text{H}_2\text{SO}_4$  before reaction, (c) acidified  $g\text{-C}_3\text{N}_4$  nanosheets  
 4 soluble in  $\text{H}_2\text{SO}_4$  after reaction, (d) the suspension of acid-soluble  $g\text{-C}_3\text{N}_4$  nanosheets in  
 5 ethanol and (e) layered  $g\text{-C}_3\text{N}_4$  nanosheets.

6

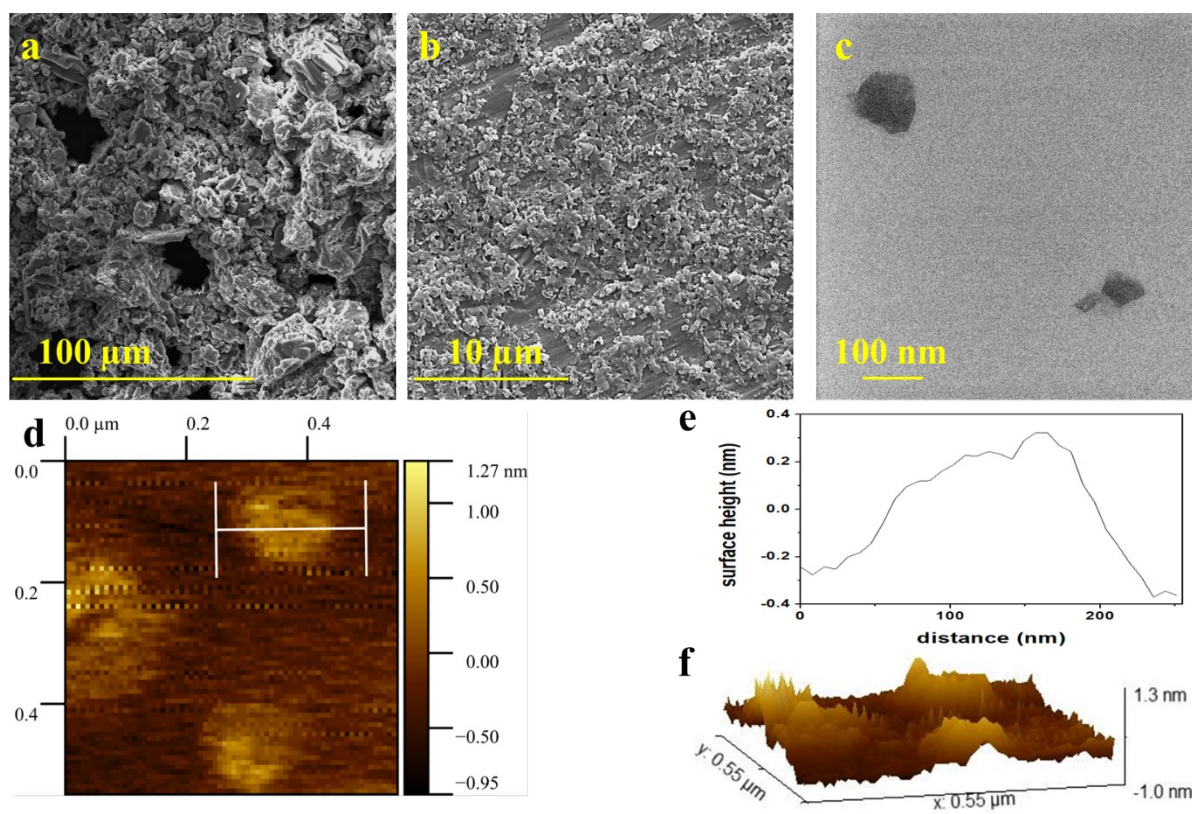

7

8 **Fig. S2.** SEM images of a) bulk  $g\text{-C}_3\text{N}_4$  powder, b) layered  $g\text{-C}_3\text{N}_4$  nanosheets and c) the  
 9 TEM image of layered  $g\text{-C}_3\text{N}_4$  nanosheets, (d) the AFM image of  $g\text{-C}_3\text{N}_4$  nanosheets with a  
 10 randomly selected line, (e) the surface height curve of the selected line from the AFM of  $g\text{-C}_3\text{N}_4$   
 11 nanosheets, (f) the 3D pattern of  $g\text{-C}_3\text{N}_4$  nanosheets.

1

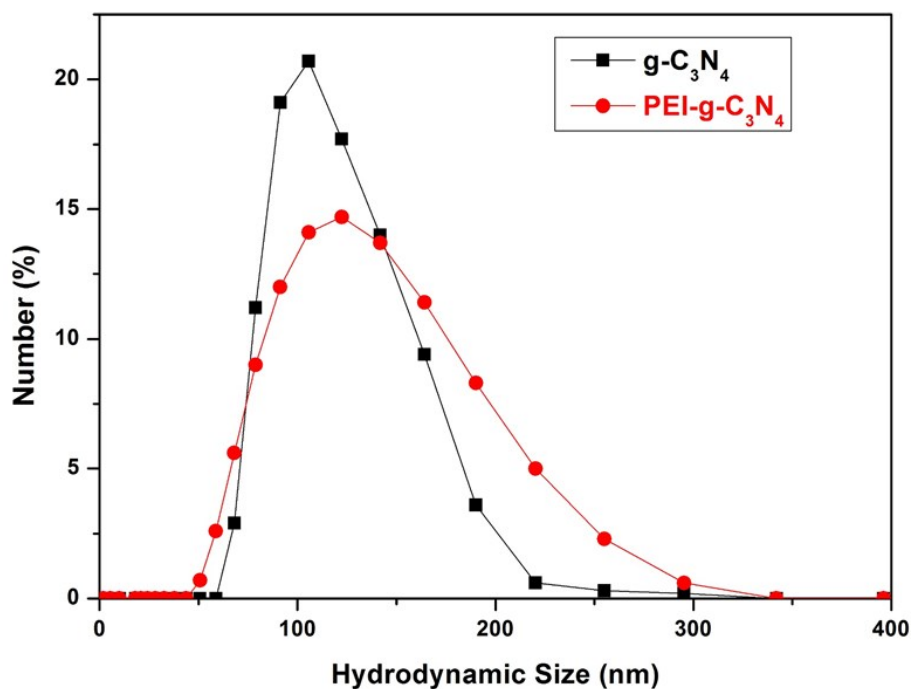

2

3 **Fig. S3.** Hydrodynamic size distributions of g-C<sub>3</sub>N<sub>4</sub> nanosheets and PEI-g-C<sub>3</sub>N<sub>4</sub> composites  
4 in water at pH 7.

5

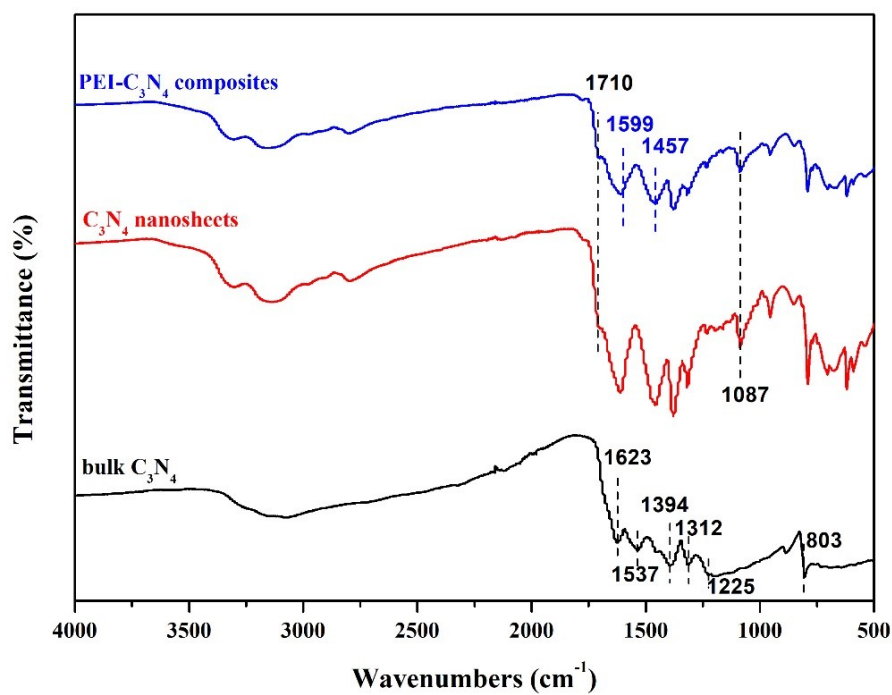

6

7 **Fig. S4.** FT-IR spectra of bulk g-C<sub>3</sub>N<sub>4</sub> powder, g-C<sub>3</sub>N<sub>4</sub> nanosheets and PEI-g-C<sub>3</sub>N<sub>4</sub> composites.

8

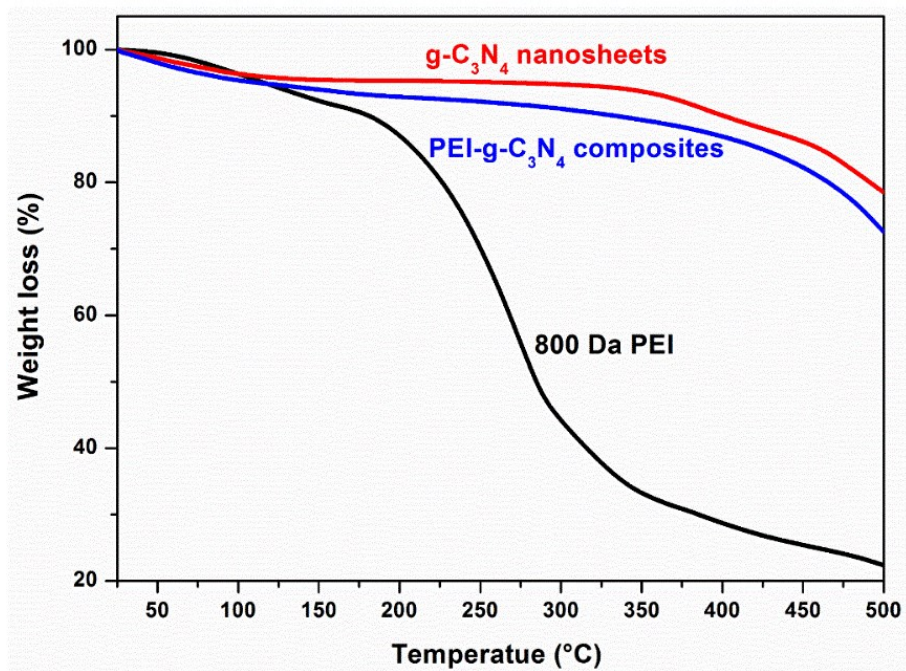

1

2 **Fig. S5.** TGA curves of the calcination processes of 800 Da of branched PEI, g-C<sub>3</sub>N<sub>4</sub>  
 3 nanosheets and PEI-g-C<sub>3</sub>N<sub>4</sub> nanocomposites.

4

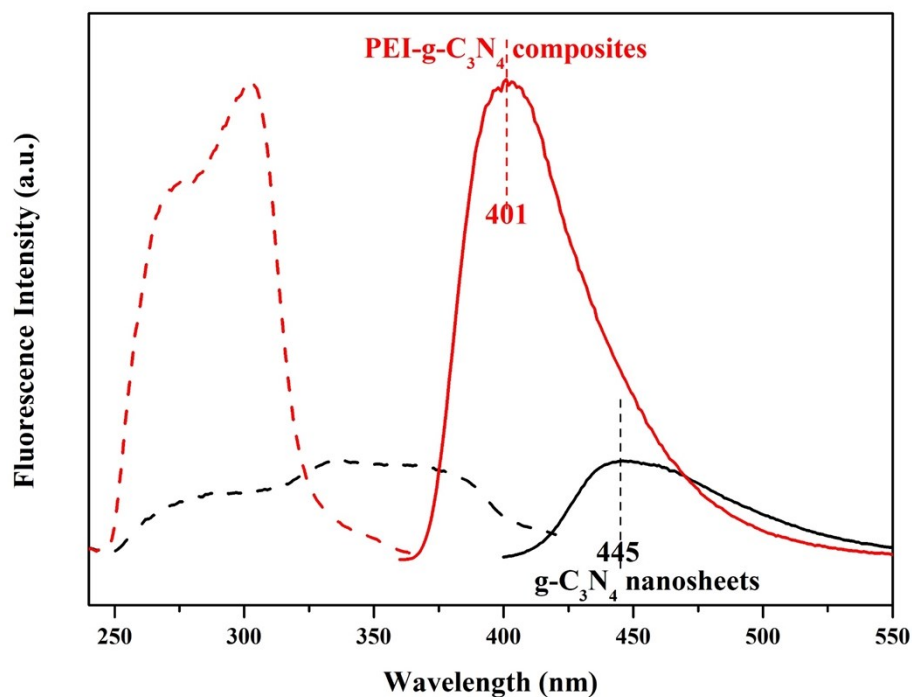

5

6 **Fig. S6.** Fluorescence excitation and emission spectra of g-C<sub>3</sub>N<sub>4</sub> nanosheets and PEI-g-C<sub>3</sub>N<sub>4</sub>  
 7 composites.

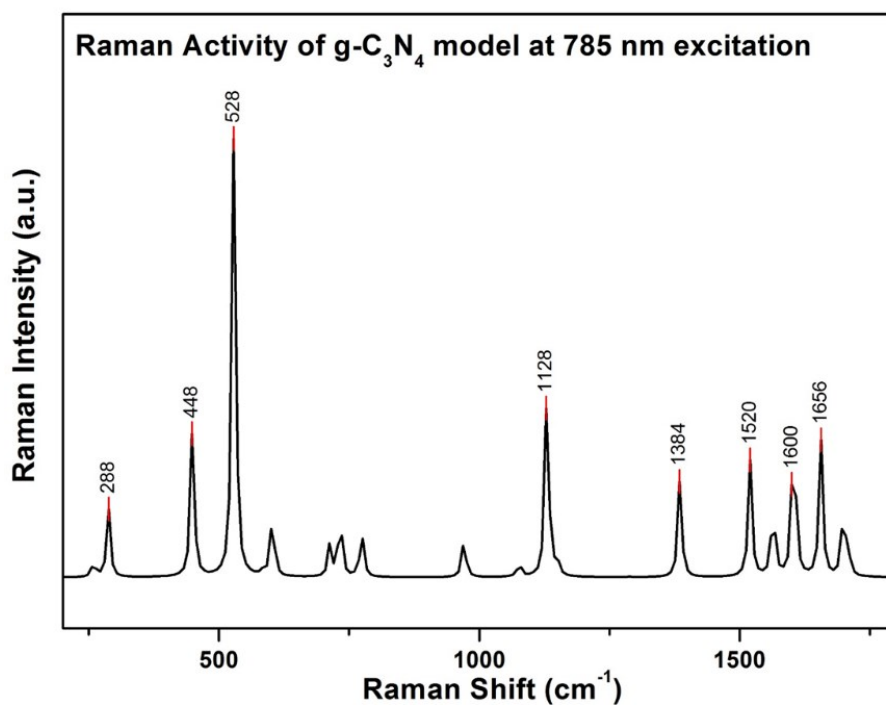

1

2 **Fig. S7.** The calculated Raman activity of g-C<sub>3</sub>N<sub>4</sub> model under 785 nm excitation laser and  
3 the vibration animations of g-C<sub>3</sub>N<sub>4</sub> model at 448 and 528 cm<sup>-1</sup> Raman shift is in the followed  
4 mp4 videos S1 and S2 at <https://doi.org/XXXXXXXX>

5

Free DNA

Weight ratio of  
materials: DNA

---

10:1 20:1 50:1 100:1 200:1

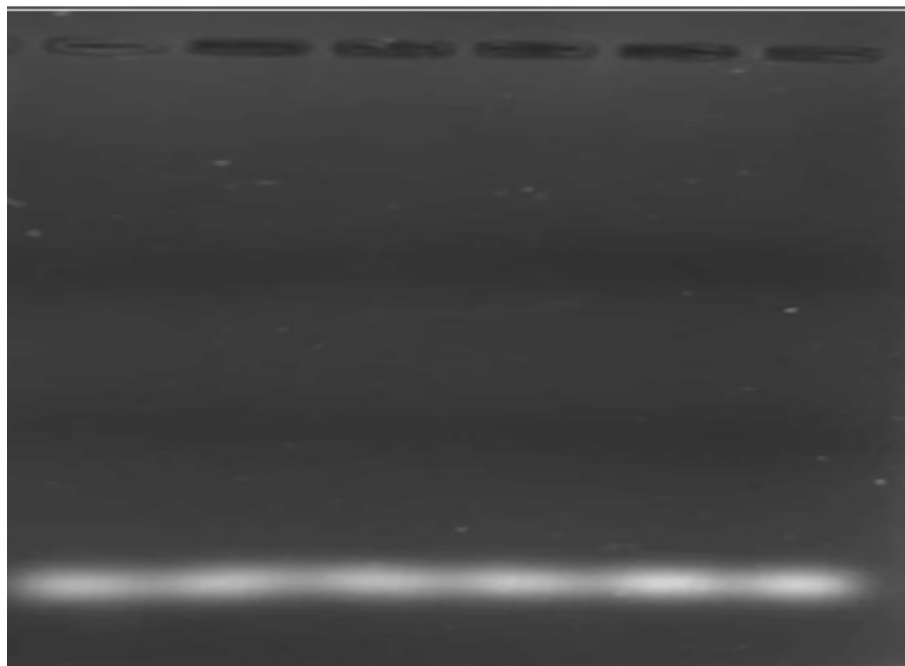

1

2 **Fig. S8.** Agarose gel electrophoresis indicating the model DNA binding capabilities of g-  
3 C<sub>3</sub>N<sub>4</sub> nanosheets at different materials to DNA weight ratios from 10 to 200.

4



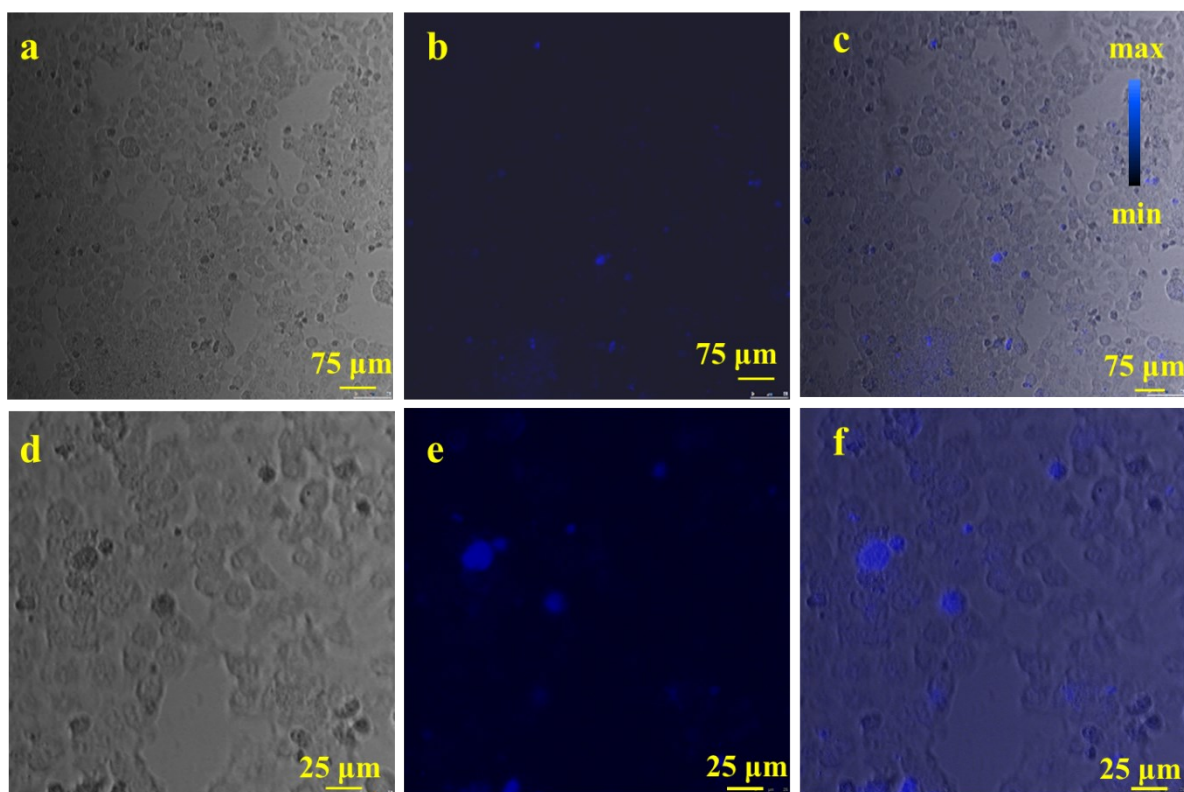

1

2 **Fig. S9.** Fluorescence images of PEI-g-C<sub>3</sub>N<sub>4</sub>@siRNA composites with low magnitude (a-c)  
3 and high magnitude (d-f), (a,d) optical images, (b,e) fluorescence images and (c,f) merged  
4 images.

5

1

2 **Table S1.** Hydrodynamic sizes and zeta potential of g-C<sub>3</sub>N<sub>4</sub> nanosheets and PEI-g-C<sub>3</sub>N<sub>4</sub>  
3 composites measured at pH 7.

| Sample name                         | PDI  | Hydrodynamic size [nm] | Zeta potential [mV] <sup>a</sup> |
|-------------------------------------|------|------------------------|----------------------------------|
| g-C <sub>3</sub> N <sub>4</sub>     | 0.25 | 118.4 ± 0.9            | -32.2 ± 1.5                      |
| PEI-g-C <sub>3</sub> N <sub>4</sub> | 0.46 | 122.1 ± 0.5            | 42.5 ± 0.1                       |

4
